# Supplementary material for: On the influence of carbide coating on the thermal conductivity and flexural strength of X (X = SiC, TiC) coated graphite/Al composites
Source: Royal Society of Chemistry journal article supplement (doi:10.1039/c6ra21754k), 2016-01-01
Supplement: c6ra21754k1.pdf [file c6ra21754k1.pdf]

## SUPPORTING INFORMATION

### **On the influence of carbide coating on the thermal conductivity and flexural strength of X (X=SiC, TiC) coated graphite/Al composites**

Chen Wang,<sup>a</sup> Hua Bai<sup>b\*</sup>, Chen Xue<sup>b</sup>, Xingsheng Tong<sup>a\*</sup>, Yingbin Zhu, Nan Jiang<sup>b\*</sup>

<sup>a</sup>*School of Electro-mechanical and Architectural Engineering Jiangnan University, Wuhan 430056, China.*

<sup>b</sup>*Key Laboratory of Marine Materials and Related Technologies, Zhejiang Key Laboratory of Marine Materials and Protective Technologies, Ningbo Institute of Materials Technology & Engineering, Chinese Academy of Sciences, Ningbo, 315201, China*

*\*Corresponding author,*

*E-mail: [baihua@nimte.ac.cn](mailto:baihua@nimte.ac.cn); [xstong@jhun.edu.cn](mailto:xstong@jhun.edu.cn); [jiangnan@nimte.ac.cn](mailto:jiangnan@nimte.ac.cn)*

## SUPPLEMENT

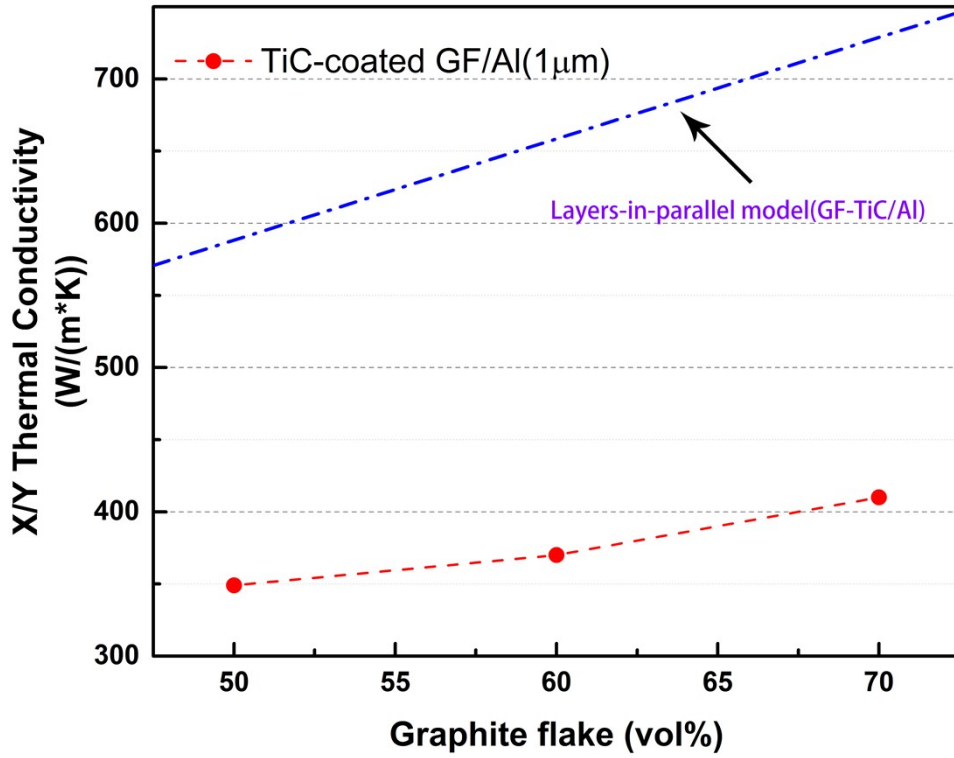

**Fig. S1.** Thermal conductivity of TiC coated GF/Al composites

**Fig. 1S** shows the thermal conductivity of TiC-coated GF composites calculated by the layers-in-parallel model predictions compared with the experimental values. And the predictions calculated by the layers-in-parallel model are higher than the experimental data. The value of  $h$  is calculated by the AMM, calculated as follows:

$$h \cong \frac{1}{2} \rho_m C_m \frac{v_m^3}{v_i^2} \frac{\rho_m v_m \rho_i v_i}{(\rho_m v_m + \rho_i v_i)^2}$$

Due to the lack of data, the phonon velocity of TiC can be derived by  $v = \sqrt{B/\rho}$ , where  $B$  is the bulk modulus taken as 250GPa for TiC.<sup>1, 2</sup> The density and specific heat of TiC are taken as 4930 kg m<sup>-3</sup> and 568 J kg<sup>-1</sup> K<sup>-1</sup>, respectively.<sup>3</sup> And the TiC layer is referred to as the inclusion for the Al/TiC layer and as the matrix for the TiC/graphite layer. The calculated results is  $h_{\text{Al/TiC}} = 1.8785 \times 10^8$  Wm<sup>-2</sup> K<sup>-1</sup> and  $h_{\text{TiC/graphite}} = 5.767 \times 10^8$  Wm<sup>-2</sup> K<sup>-1</sup>, respectively. The total interfacial thermal conductance ( $h$ ) of the TiC coated graphite/Al composite can be determined as follows:

$$\frac{1}{h} = \frac{1}{h_{Al/TiC}} + \frac{1}{h_{TiC/graphite}} + \frac{d_{TiC}}{K_{TiC}}$$

Assuming  $K_{TiC}=36.4 \text{ W/(m}\cdot\text{K)}$ ,<sup>3</sup>  $d$  is measured by FIB and the thickness of coating layer is about 329 nm. The total  $h=6.212\times 10^7 \text{ Wm}^{-2} \text{ K}^{-1}$ . Assuming  $K_m=237 \text{ W/(m}\cdot\text{K)}$ ,  $K_f=1000 \text{ W/(m}\cdot\text{K)}$ , the effective thermal conductivity, is calculated to be  $939.5 \text{ W/(m}\cdot\text{K)}$  for the TiC-GF/Al composite, which is much more than the experimental data, demonstrating that the layers-in-parallel model is not applicable for TiC-coated GF/Al composites.

## Reference

---

- 1 V. Moruzzi, J. Janak, K. Schwarz, *Phys. Rec. B*, 1988, **37**, 790.
- 2 R. Ahuja, O. Eriksson, J. Wills, B. Johansson, *Phy. Rev. B*, 1996, **53**, 3072.
- 3 Y. Zhang, H. L. Zhang, J. H. Wu, X. T. Wang, *Scr. Mater.*, 2011, **65**, 1097.
